# Supplementary material for: Oleanolic acid enhances tight junctions and ameliorates inflammation in Salmonella typhimurium-induced diarrhea in mice via the TLR4/NF-κB and MAPK pathway
Source: Royal Society of Chemistry journal article supplement (doi:10.1039/c9fo01718f), 2019-11-13
Supplement: c9fo01718f1.pdf [file c9fo01718f1.pdf]

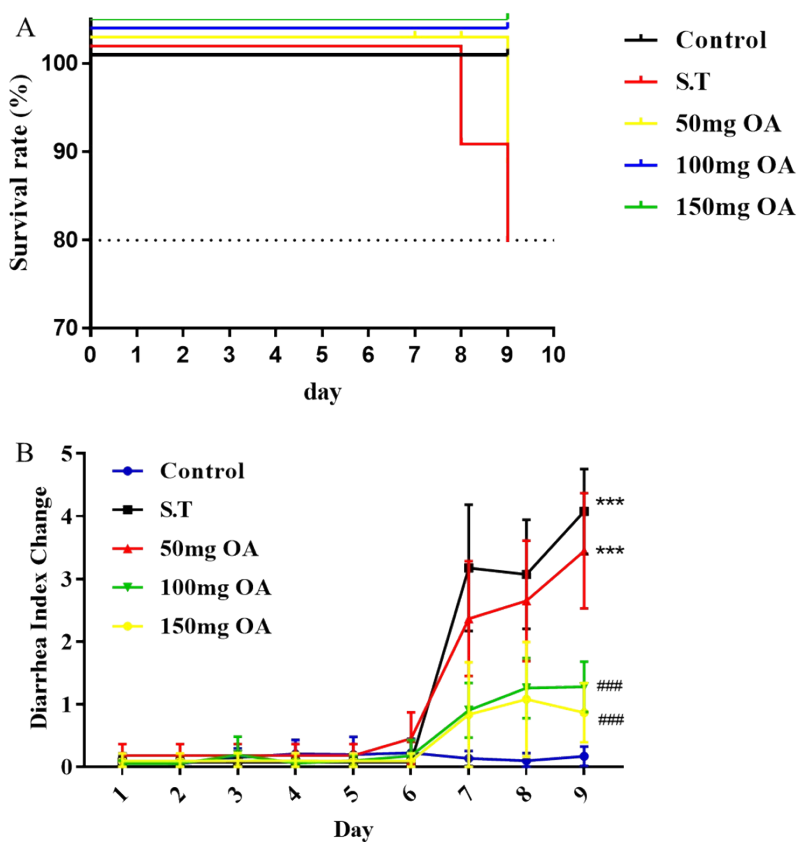

**Figure 1** Effect of different doses of OA on the development of the *S.T*-induced diarrhea model. (A) Changes in survival rate of mice in each group (n=10). (B) Changes in DAI levels were evaluated everyday throughout the 9 days of the experimental period. \*\*\* $P < 0.001$  vs. the vehicle-treated control group; ### $P < 0.001$  vs. the *S. Typhimurium*-treated group.

Table 1 body weight of Control group

| NO Day | 1     | 2     | 3     | 4     | 5     | 6     | 7     | 8     | 9     | 10    | 11    | 12    | 13    | 14    | 15    | 16    | 17    | 18    | 19    | 20    |
|--------|-------|-------|-------|-------|-------|-------|-------|-------|-------|-------|-------|-------|-------|-------|-------|-------|-------|-------|-------|-------|
| 1      | 19.82 | 23.05 | 21.15 | 20.52 | 21.46 | 19.49 | 21.88 | 22.71 | 21.58 | 21.82 | 22.16 | 21.45 | 22.61 | 20.33 | 21.82 | 21.53 | 20.12 | 22.43 | 21.19 | 21.18 |
| 2      | 20.08 | 22.76 | 21.18 | 20.36 | 22.08 | 21.48 | 22.25 | 22.4  | 21.74 | 22.83 | 22.06 | 22.79 | 23.49 | 20.78 | 22.15 | 20.98 | 21.83 | 22.85 | 21.56 | 21.75 |
| 3      | 21.08 | 23.43 | 21.91 | 21.48 | 22.06 | 22.12 | 21.9  | 21.88 | 23    | 23.4  | 22.35 | 22.06 | 23.19 | 21.4  | 23.55 | 22.22 | 22.18 | 22.72 | 21.75 | 23.16 |
| 4      | 21.75 | 23.75 | 22.91 | 21.26 | 23.6  | 23.95 | 22.15 | 22.1  | 23.68 | 22.79 | 22.16 | 23.09 | 23.61 | 22.8  | 22.95 | 23.29 | 23.01 | 23.01 | 21.34 | 23.43 |
| 5      | 21.34 | 23.7  | 22.15 | 22.52 | 22.56 | 23.66 | 21.88 | 22.71 | 23.83 | 22.83 | 22.58 | 23.79 | 23.17 | 21.98 | 23.52 | 23.62 | 23.15 | 23.2  | 22.76 | 23.7  |
| 6      | 21.19 | 23.16 | 23.98 | 22.26 | 23.94 | 23.38 | 22.48 | 21.12 | 23.65 | 23.16 | 23.5  | 24.65 | 23.93 | 22.6  | 23.9  | 23.83 | 23.88 | 23.2  | 23.98 | 23.7  |
| 7      | 21.98 | 23.9  | 23.74 | 23.84 | 23.63 | 23.98 | 23.48 | 21.87 | 23.93 | 23.92 | 24.52 | 24.09 | 24.62 | 23.27 | 23.11 | 23.35 | 23.49 | 23.82 | 23.16 | 23.9  |
| 8      | 23.16 | 23.95 | 25.05 | 24.98 | 22.99 | 24.63 | 24.96 | 22.96 | 23.03 | 23.65 | 25.02 | 24.27 | 25.45 | 24.76 | 24.82 | 22.94 | 24.86 | 24.05 | 23.81 | 23.95 |
| 9      | 23.81 | 24    | 24.49 | 25.29 | 23.6  | 24.55 | 25.31 | 22.4  | 24.86 | 24.39 | 24.96 | 23.9  | 25.36 | 25.13 | 24.92 | 23.6  | 25.09 | 24    | 23.56 | 22.95 |

Table 2 body weight of S.T group

| NO Day | 1     | 2     | 3     | 4     | 5     | 6     | 7     | 8     | 9     | 10    | 11    | 12    | 13    | 14    | 15    | 16    | 17    | 18    | 19    | 20    |
|--------|-------|-------|-------|-------|-------|-------|-------|-------|-------|-------|-------|-------|-------|-------|-------|-------|-------|-------|-------|-------|
| 1      | 21.6  | 22.18 | 21.58 | 22.65 | 21.22 | 21.66 | 24.33 | 22.51 | 21.22 | 23.24 | 21.24 | 21.64 | 20.1  | 22.27 | 22.63 | 20.47 | 21.76 | 20.22 | 21.6  | 22.18 |
| 2      | 21.62 | 22.79 | 21.84 | 22.14 | 21.9  | 22.54 | 24.73 | 22.93 | 22.76 | 23.69 | 21.49 | 22.14 | 21.9  | 22.4  | 23.11 | 21.26 | 22.94 | 21.88 | 21.62 | 22.79 |
| 3      | 22.08 | 23.07 | 22.54 | 22.91 | 22.03 | 22.91 | 22.65 | 23.23 | 22.81 | 23.74 | 21.42 | 21.38 | 22.95 | 22.57 | 22.52 | 22.38 | 23.46 | 22.02 | 22.08 | 23.07 |
| 4      | 22.15 | 23.42 | 22.19 | 22.4  | 22.3  | 23.53 | 23.02 | 23.52 | 22.67 | 24    | 22.13 | 22.01 | 23.26 | 21.83 | 22.24 | 21.84 | 23.2  | 21.98 | 23.15 | 22.82 |
| 5      | 23.02 | 24.6  | 22.06 | 21.76 | 22.49 | 23.17 | 22.65 | 23.64 | 22.4  | 23.34 | 22.35 | 22.17 | 23.17 | 22    | 22.76 | 22.34 | 23.24 | 22.03 | 22.72 | 22.6  |
| 6      | 22.09 | 24.07 | 21.98 | 22.41 | 23.15 | 23.2  | 21.5  | 24.78 | 22.72 | 24.52 | 22.68 | 22.96 | 24.64 | 22.86 | 22.09 | 23.51 | 23.51 | 22.65 | 22.98 | 22.07 |
| 7      | 22.71 | 21.01 | 21    | 20.02 | 23.34 | 22.96 | 19.58 | 23.67 | 20.44 | 23.67 | 22.55 | 21.25 | 20.59 | 20.07 | 22.3  | 21.45 | 22.34 | 20    | 22.71 | 21.01 |
| 8      | 20.84 | 20.78 | 20.85 | 19.73 | 20.63 | 18.82 | 16.94 | 20.51 |       | 22.85 | 21.45 | 20.05 | 18.61 | 18.3  | 20.14 | 20.34 | 19.19 | 19.78 | 20.84 | 20.78 |
| 9      | 17.51 | 17.48 | 19.47 | 19.99 | 19.81 | 18.8  |       | 19.64 |       | 21.42 | 19.8  | 16.21 | 15.59 | 16.07 | 18.35 | 19.08 | 17.78 | 17.67 | 17.51 | 19.48 |

| NO Day | 1     | 2     | 3     | 4     | 5     | 6     | 7     | 8     | 9     | 10    | 11    | 12    | 13    | 14    | 15    | 16    | 17    | 18    | 19    | 20    |
|--------|-------|-------|-------|-------|-------|-------|-------|-------|-------|-------|-------|-------|-------|-------|-------|-------|-------|-------|-------|-------|
| 1      | 22.76 | 20.7  | 21.31 | 21.63 | 23.28 | 22.89 | 20.51 | 21.8  | 22.3  | 20.28 | 20.62 | 21.17 | 22.65 | 21.95 | 22.31 | 22.63 | 21.39 | 21.39 | 22.76 | 20.7  |
| 2      | 21.51 | 21.31 | 22.28 | 20.96 | 23.62 | 22.39 | 20.81 | 22.06 | 21.86 | 21.76 | 21.86 | 21.49 | 22.76 | 23    | 22.46 | 23.89 | 21.32 | 23.89 | 22.51 | 21.31 |
| 3      | 22.03 | 21.22 | 22.51 | 21.69 | 23.23 | 22.63 | 21.27 | 20.83 | 22.61 | 21.9  | 21.66 | 22.67 | 22.67 | 23.56 | 23.07 | 24.9  | 21.88 | 23.01 | 23.03 | 21.22 |
| 4      | 22.23 | 21.39 | 22.37 | 21.96 | 24.12 | 23.22 | 22.07 | 22.21 | 22.6  | 21    | 21.34 | 22.19 | 22.9  | 22.86 | 24.13 | 23.6  | 23.22 | 23.23 | 23.23 | 20.39 |
| 5      | 20.52 | 20.97 | 22.12 | 22.11 | 25.48 | 23.07 | 24.99 | 23.08 | 23.67 | 22.28 | 21.08 | 22.69 | 23.15 | 24.28 | 25.39 | 23.32 | 23.2  | 22.19 | 23.52 | 20.67 |
| 6      | 20.55 | 21.83 | 23.52 | 23.77 | 25.49 | 23.58 | 24.29 | 23.27 | 24.79 | 22.6  | 21.82 | 21.86 | 23.39 | 23.84 | 24.22 | 23.45 | 23.18 | 22.69 | 22.89 | 21.83 |
| 7      | 20.51 | 21.49 | 22.42 | 21.96 | 24.51 | 23.19 | 24.15 | 23.82 | 24.33 | 22.29 | 21.32 | 21.32 | 22.54 | 23.28 | 23.39 | 23.72 | 24.08 | 23.05 | 22.51 | 22.49 |
| 8      | 19.95 | 21.29 | 20.42 | 20.96 | 24.01 | 22.9  | 23.15 | 24.22 | 25.33 | 21.9  | 21.42 | 22.32 | 22.84 | 23.09 | 22.89 | 22.47 | 23.68 | 22.55 | 22.31 | 22.19 |
| 9      | 20.5  | 20.5  | 20.39 | 20.05 | 23.85 | 22.5  | 23.5  | 23.4  | 24.1  | 21.6  | 20.3  | 21.5  | 22.5  | 23.37 | 22.51 | 22.98 | 23.4  | 22.55 | 21.78 | 21.5  |

Table 3 body weight of S.T + OA group

Table 4 body weight of OA group

| NO Day | 1     | 2     | 3     | 4     | 5     | 6     | 7     | 8     | 9     | 10    | 11    | 12    | 13    | 14    | 15    | 16    | 17    | 18    | 19    | 20    |
|--------|-------|-------|-------|-------|-------|-------|-------|-------|-------|-------|-------|-------|-------|-------|-------|-------|-------|-------|-------|-------|
| 1      | 21.61 | 21.58 | 20.34 | 21.41 | 19.53 | 22.68 | 21.98 | 21.04 | 22.03 | 20.42 | 22.34 | 21.32 | 22.77 | 21.05 | 20.13 | 22.1  | 20.22 | 22.93 | 21.61 | 21.58 |
| 2      | 21.62 | 22.19 | 20.53 | 21.54 | 21.8  | 23.08 | 23.3  | 21.2  | 23.3  | 21.96 | 22.54 | 22.73 | 22.72 | 22.73 | 20.88 | 22.68 | 21.01 | 22.03 | 21.62 | 22.19 |
| 3      | 21.9  | 22.63 | 20.4  | 22.04 | 21.13 | 23.2  | 21.51 | 22.52 | 23.04 | 22.55 | 22.84 | 23.32 | 21.51 | 22.8  | 21.3  | 23.69 | 22.12 | 21.81 | 21.7  | 23.63 |
| 4      | 22.09 | 22.72 | 21.81 | 22.22 | 22.08 | 23.34 | 21.24 | 22.46 | 23.93 | 22.32 | 23.21 | 23.06 | 21.92 | 23.65 | 22.31 | 24.46 | 22.72 | 22.58 | 22.09 | 23.72 |
| 5      | 22.34 | 23.05 | 21.71 | 22.41 | 22.72 | 23.67 | 23.36 | 22.75 | 24.84 | 23.43 | 23.55 | 24.47 | 22.35 | 23.95 | 21.63 | 24.98 | 21.93 | 22.35 | 22.34 | 23.05 |
| 6      | 22.06 | 24.2  | 22.86 | 23.34 | 22.97 | 22.92 | 22.03 | 22.86 | 24.25 | 24.47 | 23.86 | 24.77 | 23.2  | 23.08 | 22.08 | 24.2  | 23.09 | 22.45 | 22.06 | 23.2  |
| 7      | 23.5  | 24.61 | 22.99 | 23.3  | 23.96 | 23.72 | 24.79 | 23.64 | 25    | 24.29 | 24.5  | 25.1  | 23.22 | 23.53 | 22.83 | 24.26 | 23.7  | 23.03 | 24.5  | 23.01 |
| 8      | 24.02 | 25.22 | 23.56 | 23.75 | 23.82 | 24.37 | 24.34 | 23.78 | 25.09 | 24.77 | 24.08 | 25.32 | 23.98 | 24.48 | 22.94 | 25.37 | 24.82 | 24.34 | 24.02 | 24.22 |
| 9      | 24.67 | 26.78 | 24.34 | 23.83 | 23.23 | 24.32 | 24.38 | 24.06 | 25.45 | 25.63 | 25.68 | 26.27 | 24.47 | 24.1  | 23.08 | 26.06 | 24.13 | 25.31 | 24.67 | 24.78 |
